# Supplementary material for: Identification of TPM2 and CNN1 as Novel Prognostic Markers in Functionally Characterized Human Colon Cancer-Associated Stromal Cells
Source: MDPI journal article supplement (doi:10.3390/cancers14082024), 2022-04-16
Supplement: s1 [file s1]

Supplementary Material

**Table S1.** Clinical-pathological characteristics of tumor samples from which TASCs used in experiments were derived

| Features       |             | Frequency n (%) |
|----------------|-------------|-----------------|
| Tumor location | Left-sided  | 5 (62.5)        |
|                | Right-sided | 3 (37.5)        |
| Grade          | G1          | 3 (37.5)        |
|                | G2          | 5 (62.5)        |
|                | G3          | 0 (0)           |
|                | G4          | 0 (0)           |
| pT stage       | T1          | 1 (12.5)        |
|                | T2          | 1 (12.5)        |
|                | T3          | 6 (75)          |
|                | T4          | 0 (0)           |
| pN stage       | N0          | 3 (37.5)        |
|                | N1          | 4 (50)          |
|                | N2          | 1 (12.5)        |

**Table S2.** List of antibodies used for flow cytometry and immunofluorescence.

| Name       | Clone      | Brand             | Dilution used |
|------------|------------|-------------------|---------------|
| CD90       | 5E10       | BD                | 1:200         |
| CD73       | AD2        | BD                | 1:50          |
| CD105      | 43A3       | Biolegend         | 1:200         |
| CD29       | TS2/16     | Biolegend         | 1:200         |
| CD146      | SHM-57     | Biolegend         | 1:200         |
| CD34       | 581        | BD                | 1:25          |
| CD45       | HI30       | Biolegend         | 1:200         |
| CD31       | WM59       | Biolegend         | 1:200         |
| CD31       | Mec 13.3   | BD                | 1:100         |
| aSMA       | E184       | Abcam             | 1:100         |
| aSMA       | 1A4        | SIGMA             | 1:100         |
| FAP        | 1E5        | Abcam             | 1:100         |
| FSP-1      | EPR2761(2) | Novus Biologicals | 1:100         |
| EpCAM      | EBA-1      | Biolegend, BD     | 1:50          |
| EpCAM      | 9C4        | Biolegend         | 1:200         |
| EpCAM      | VU1D9      | Cell Signalling   | 1:200         |
| TGFβ       | 9016       | R&D Systems       | 1:50          |
| PDPN       | NC-08      | Biolegend         | 1:200         |
| E-Cadherin | 67A4       | Biolegend         | 1:100         |
| N-Cadherin | 8C11       | Biolegend         | 1:100         |
| Vimentin   | D21H3      | Cell Signalling   | 1:100         |
| αvβ6       | 53a.2      | Abcam             | 1:100         |

|      |         |       |       |
|------|---------|-------|-------|
| Ki67 | EPR3610 | Abcam | 1:200 |
|------|---------|-------|-------|

Table S3. Proteins significantly upregulated in TASCs versus MASCs.

| Protein description                                                           | UniProt  | Gene     | NSAF <sup>1</sup> | log2 T/M ratio <sup>2</sup> | -log10 adj p-value |
|-------------------------------------------------------------------------------|----------|----------|-------------------|-----------------------------|--------------------|
| Transgelin                                                                    | Q01995   | TAGLN    | 2.8507            | 1.369591776                 | 2.024216788        |
| Isoform 2 of Tropomyosin beta chain                                           | P07951-2 | TPM2     | 2.1303            | 1.146955709                 | 1.930278652        |
| Actin, aortic smooth muscle                                                   | P62736   | ACTA2    | 1.0451            | 0.73306496                  | 1.667646232        |
| Cysteine and glycine-rich protein 1                                           | P21291   | CSRP1    | 0.62694           | 1.028708326                 | 1.629555599        |
| Isoform 1 of Vinculin                                                         | P18206-2 | VCL      | 0.59756           | 0.731613704                 | 2.072906862        |
| Isoform 2 of Tropomyosin alpha-4 chain                                        | P67936-2 | TPM4     | 0.50352           | 1.218728987                 | 3.660414337        |
| Calponin-1                                                                    | P51911   | CNN1     | 0.45455           | 0.693143643                 | 2.042665302        |
| Four and a half LIM domains protein 2                                         | Q14192   | FHL2     | 0.45161           | 0.61098913                  | 2.11323767         |
| Myosin regulatory light polypeptide 9                                         | P24844   | MYL9     | 0.29651           | 0.859685477                 | 2.164914646        |
| Superoxide dismutase [Mn], mitochondrial                                      | P04179   | SOD2     | 0.24324           | 1.430159513                 | 1.375014938        |
| Myosin-11                                                                     | P35749   | MYH11    | 0.15314           | 0.776470331                 | 1.364268629        |
| Aldehyde dehydrogenase X, mitochondrial                                       | P30837   | ALDH1B1  | 0.14313           | 0.665703034                 | 1.894322199        |
| Isoform 8 of Tropomyosin alpha-1 chain                                        | P09493-8 | TPM1     | 0.12676           | 0.659642581                 | 1.300274496        |
| Isoform Del-1790 of Myosin light chain kinase                                 | Q15746-6 | MYLK     | 0.11657           | 0.710862859                 | 1.868401708        |
| Isoform PDE5A2 of cGMP-specific 3',5'-cyclic phosphodiesterase                | O76074   | PDE5A    | 0.084034          | 0.655432099                 | 1.409133562        |
| Tubulin beta-2A chain                                                         | Q13885   | TUBB2A   | 0.083146          | 0.622955915                 | 1.885446624        |
| Isoform 2 of PDZ and LIM domain protein 3                                     | Q53GG5-2 | PDLIM3   | 0.079114          | 1.664154334                 | 2.97566031         |
| Intercellular adhesion molecule 1                                             | P05362   | ICAM1    | 0.073308          | 1.928758837                 | 2.40873185         |
| von Willebrand factor A domain-containing protein 5A                          | O00534   | VWA5A    | 0.062341          | 0.608349475                 | 2.166147035        |
| Synemin                                                                       | O15061   | SYNM     | 0.061981          | 0.634940911                 | 1.419658575        |
| Cell surface glycoprotein MUC18                                               | P43121   | MCAM     | 0.055728          | 1.088975189                 | 3.069731623        |
| Isoform 2 of CD82 antigen                                                     | P27701   | CD82     | 0.053719          | 0.905728254                 | 3.03133314         |
| Isoform 2 of Sarcolemmal membrane-associated protein                          | Q14BN4-2 | SLMAP    | 0.039241          | 1.408815068                 | 1.870052561        |
| Peptidyl-prolyl cis-trans isomerase F, mitochondrial                          | P30405   | PIPF     | 0.038647          | 0.598108968                 | 1.346828397        |
| Profilin-2                                                                    | P35080   | PFN2     | 0.035714          | 0.609263793                 | 2.21497501         |
| Isoform 2 of Sorbin and SH3 domain-containing protein 2                       | O94875-2 | SORBS2   | 0.034535          | 0.721487744                 | 1.333348543        |
| TBC1 domain family member 2A                                                  | Q9BYX2   | TBC1D2   | 0.032328          | 0.676395709                 | 2.311535917        |
| Isoform 4 of Protein MRVI1                                                    | Q9Y6F6-4 | MRVI1    | 0.032115          | 0.873990944                 | 1.768513891        |
| Interferon-induced GTP-binding protein Mx1                                    | P20591   | MX1      | 0.030211          | 1.0648971                   | 1.657913505        |
| Annexin A3                                                                    | P12429   | ANXA3    | 0.027864          | 1.445390134                 | 1.433163419        |
| Interferon-induced protein with tetratricopeptide repeats 3                   | O14879   | IFIT3    | 0.026531          | 1.102235479                 | 2.296449251        |
| Na(+)/H(+) exchange regulatory cofactor NHE-RF1                               | O14745   | SLC9A3R1 | 0.02514           | 0.613075965                 | 1.37828742         |
| Integrin alpha-3                                                              | P26006   | ITGA3    | 0.024738          | 1.157701255                 | 2.045437517        |
| GDP-mannose 4,6 dehydratase                                                   | O60547   | GMDS     | 0.024194          | 0.642798867                 | 2.121599529        |
| Pyroglutamyl-peptidase 1                                                      | Q9NXJ5   | PGPEP1   | 0.023923          | 0.670435865                 | 1.539127543        |
| Isoform 2 of Redox-regulatory protein FAM213A                                 | Q9BRX8   | FAM213A  | 0.022936          | 0.97053097                  | 2.749372394        |
| 5'-nucleotidase domain-containing protein 3                                   | Q86UY8   | NT5DC3   | 0.021898          | 1.023362305                 | 1.526041891        |
| Isoform 2 of EGF-like repeat and discoidin I-like domain-containing protein 3 | O43854-2 | EDIL3    | 0.019149          | 0.89064351                  | 1.892695166        |
| C-X-C motif chemokine 14                                                      | O95715   | CXCL14   | 0.018018          | 0.634647798                 | 1.388565252        |
| Junctional protein associated with coronary artery disease                    | Q9P266   | KIAA1462 | 0.014717          | 0.815090113                 | 2.01049799         |
| Isoform 2 of Cordon-bleu protein-like 1                                       | Q53SF7   | COBLL1   | 0.01458           | 1.164800305                 | 1.844518957        |
| Beta-2-glycoprotein 1                                                         | P02749   | APOH     | 0.014493          | 0.6092497                   | 1.77113088         |
| Squalene synthase                                                             | P37268   | FDFT1    | 0.014388          | 0.58771711                  | 1.544439462        |
| Isoform 3 of Endoplasmic reticulum aminopeptidase 2                           | Q6P179-3 | ERAP2    | 0.014208          | 0.805458491                 | 1.351017808        |
| Eukaryotic translation initiation factor 1A, Y-chromosomal                    | O14602   | EIF1AY   | 0.013889          | 2.116864833                 | 1.704081173        |
| Isoform 2 of Mitogen-activated protein kinase kinase kinase MLT               | Q9NYL2-2 | ZAK      | 0.013187          | 1.284414688                 | 1.462184202        |
| Uncharacterized protein C15orf52                                              | Q6ZUT6   | C15orf52 | 0.013109          | 0.59257026                  | 1.329147307        |
| Fructosamine-3-kinase                                                         | Q9H479   | FN3K     | 0.012945          | 0.599023216                 | 1.754148201        |
| Isoform 2 of Receptor expression-enhancing protein 2                          | Q9BRK0-2 | REEP2    | 0.011811          | 0.786168972                 | 1.604696573        |
| Desmoglein-2                                                                  | Q14126   | DSG2     | 0.010733          | 1.113110737                 | 1.413378891        |
| snRNA-activating protein complex subunit 5                                    | O75971   | SNAPC5   | 0.010204          | 0.660994283                 | 2.095003198        |
| NADP-dependent malic enzyme, mitochondrial                                    | Q16798   | ME3      | 0.0099338         | 0.650368603                 | 1.508888857        |

|                                                                                          |          |           |            |             |             |
|------------------------------------------------------------------------------------------|----------|-----------|------------|-------------|-------------|
| Isoform 2 of Dual specificity protein phosphatase 22                                     | Q9NRW4-2 | DUSP22    | 0.0097561  | 0.588674525 | 1.915816667 |
| Ras-related protein Rab-27B                                                              | O00194   | RAB27B    | 0.0091743  | 0.73147857  | 1.318090928 |
| Synaptopodin-2                                                                           | Q9UMS6   | SYNPO2    | 0.0091491  | 1.152318809 | 2.324063334 |
| Isoform 2 of Neuronal growth regulator 1                                                 | Q7Z3B1-2 | NEGR1     | 0.0088496  | 0.623248463 | 1.764740807 |
| GMP reductase 1                                                                          | P36959   | GMPR      | 0.0086957  | 0.666657304 | 1.367637382 |
| Ephrin-B1                                                                                | P98172   | EFNB1     | 0.0086705  | 0.681586149 | 2.407998395 |
| Neural cell adhesion molecule 2                                                          | O15394   | NCAM2     | 0.0083632  | 1.075789734 | 2.521357996 |
| Complement C1q tumor necrosis factor-related protein 5                                   | Q9BXJ0   | C1QTNF5   | 0.0082305  | 0.63021796  | 1.901545219 |
| N-acetylgalactosaminyltransferase 7                                                      | Q86SF2   | GALNT7    | 0.0076103  | 0.765409681 | 1.382277499 |
| Isoform I of Septin-6                                                                    | Q14141-4 | SEPT6     | 0.0070258  | 1.174872486 | 2.666389117 |
| Collectin-12                                                                             | Q5KU26   | COLEC12   | 0.0067385  | 0.839409378 | 2.703170057 |
| Isoform 3 of Alpha-actinin-1                                                             | P12814-3 | ACTN1     | 0.0067265  | 0.653256818 | 1.551684606 |
| Ninjurin-1                                                                               | Q92982   | NINJ1     | 0.0065789  | 0.661403942 | 2.378112927 |
| Actin-binding LIM protein 1                                                              | O14639   | ABLIM1    | 0.0064267  | 0.927887461 | 1.874323618 |
| Sodium-dependent phosphate transporter 2                                                 | Q08357   | SLC20A2   | 0.006135   | 1.181213583 | 1.390201729 |
| Pro-cathepsin H                                                                          | P09668   | CTSH      | 0.0059701  | 0.960753372 | 2.141276676 |
| Isoform 2 of Growth arrest-specific protein 6                                            | Q14393-2 | GAS6      | 0.0058997  | 1.118955025 | 2.436266589 |
| Isoform 2 of Serine protease 23                                                          | O95084-2 | PRSS23    | 0.005698   | 1.065393153 | 3.139927518 |
| Maestro heat-like repeat-containing protein family member 1                              | Q8NDA8   | MROH1     | 0.0054845  | 0.605337925 | 1.785431841 |
| Isoform 2 of Solute carrier family 2, facilitated glucose transporter member 6 GN=SLC2A6 | Q9UGQ3   | SLC2A6    | 0.0044944  | 0.725661842 | 1.563477258 |
| Isoform 2 of DENN domain-containing protein 3                                            | A2RUS2   | DENND3    | 0.004363   | 1.50656138  | 2.896299523 |
| Junctophilin-2                                                                           | Q9BR39   | JPH2      | 0.0043103  | 1.917760552 | 2.367822915 |
| Isoform 2 of Multiple PDZ domain protein                                                 | O75970-2 | MPDZ      | 0.0039196  | 0.653794964 | 1.713013374 |
| Phosphoinositide-3-kinase-interacting protein 1                                          | Q96FE7   | PIK3IP1   | 0.0038023  | 1.004159992 | 2.725592963 |
| Isoform 2 of Disheveled-associated activator of morphogenesis 2                          | Q86T65   | DAAM2     | 0.0037488  | 0.625118135 | 1.526883815 |
| Protein FAM84A                                                                           | Q96KN4   | FAM84A    | 0.0034247  | 1.713092913 | 3.016708531 |
| Kelch-like protein 21                                                                    | Q9UJP4   | KLHL21    | 0.0033501  | 1.058100137 | 2.145910136 |
| Isoform 2 of Xenotropic and polytropic retrovirus receptor 1                             | Q9UBH6   | XPR1      | 0.0031696  | 0.690162944 | 2.434796638 |
| Isoform 3 of Bcl-2-like protein 12                                                       | Q9HB09-3 | BCL2L12   | 0.003003   | 0.628582242 | 1.521943617 |
| Isoform LCRMP-1 of Dihydropyrimidinase-related protein 1                                 | Q14194-2 | CRMP1     | 0.0029155  | 0.668038969 | 1.959832867 |
| Beta-1,4-galactosyltransferase 4                                                         | O60513   | B4GALT4   | 0.002907   | 0.805925093 | 1.660352963 |
| Zinc finger BED domain-containing protein 1                                              | O96006   | ZBED1     | 0.0028818  | 0.835505836 | 1.430145763 |
| Isoform 5 of Disabled homolog 2-interacting protein                                      | Q5VWQ8   | DAB2IP    | 0.0026502  | 0.613816689 | 2.113292909 |
| Isoform 2 of Solute carrier family 2, facilitated glucose transporter member 4           | P14672   | SLC2A4    | 0.0024096  | 1.29691691  | 3.180367016 |
| Phosphatidylcholine:ceramide cholinephosphotransferase 1                                 | Q86VZ5   | SGMS1     | 0.0023866  | 0.771686724 | 1.828680742 |
| Isoform 5 of CCR4-NOT transcription complex subunit 4                                    | O95628-5 | CNOT4     | 0.0023095  | 0.651292955 | 2.118262217 |
| Integral membrane protein GPR155                                                         | Q7Z3F1   | GPR155    | 0.0022989  | 0.640027315 | 2.147542393 |
| Interferon-induced protein 44                                                            | Q8TCB0   | IFI44     | 0.0022523  | 0.749256786 | 1.885455005 |
| Disintegrin and metalloproteinase domain-containing protein 19                           | Q9H013   | ADAM19    | 0.0020942  | 0.594223888 | 1.549447658 |
| Ribosomal protein S6 kinase beta-2                                                       | Q9UBS0   | RPS6KB2   | 0.0020747  | 0.64001956  | 1.501764907 |
| Isoform 4 of Rho guanine nucleotide exchange factor 10-like protein                      | Q9HCE6-4 | ARHGEF10L | 0.0020367  | 0.901245663 | 2.134385685 |
| Amphotericin-induced protein 2                                                           | Q86SJ2   | AMIGO2    | 0.0019157  | 0.585036598 | 2.038956885 |
| SH3KBP1-binding protein 1                                                                | Q8TBC3   | SHKBP1    | 0.0014144  | 0.646003345 | 1.615812668 |
| Isoform 2 of Telomere-associated protein RIF1                                            | Q5UIP0-2 | RIF1      | 0.0012265  | 2.074826105 | 4.306720488 |
| Isoform 2 of Neural cell adhesion molecule 1                                             | P13591-1 | NCAM1     | 0.0011792  | 0.725111612 | 1.371141475 |
| DNA (cytosine-5)-methyltransferase 3A                                                    | Q9Y6K1   | DNMT3A    | 0.0010965  | 0.64407483  | 1.914928422 |
| Isoform 2 of Nesprin-2                                                                   | Q8WXH0   | SYNE2     | 0.0010135  | 0.960456358 | 1.342666208 |
| Sterol regulatory element-binding protein 2                                              | Q12772   | SREBF2    | 0.00087642 | 0.676395721 | 1.419569465 |
| Phosphatidylinositol 4-phosphate 3-kinase C2 domain-containing subunit beta              | O00750   | PIK3C2B   | 0.000612   | 0.650472734 | 2.377016406 |
| Isoform 2 of Dedicator of cytokinesis protein 4                                          | Q8N1I0   | DOCK4     | 0.00051626 | 0.833251423 | 1.319558447 |
| Isoform 2 of Myosin-14                                                                   | Q7Z406-6 | MYH14     | 0.00049116 | 0.635395693 | 1.820246093 |
| Isoform 1 of Striated muscle preferentially expressed protein kinase                     | Q15772   | SPEG      | 0.00031027 | 0.828858327 | 1.748434026 |

<sup>1</sup> Normalized Spectral Abundance Factor (NSAF)<sup>2</sup> T/M ratio=TASCs/MASCs ratio

**Table S4.** Previously reported TASC markers

| Protein description                                            | UniProt  | Gene        | NSAF <sup>1</sup> | log2<br>T/M ratio | -log10<br>p-value | adj | K-M<br>p value<br>(median) <sup>2</sup> | K-M<br>p value<br>(best) <sup>3</sup> |
|----------------------------------------------------------------|----------|-------------|-------------------|-------------------|-------------------|-----|-----------------------------------------|---------------------------------------|
| Protein S100-A4 FSP1                                           | P26447   | FSP1 S100A4 | 0.24752           | 0.01300           | 0.0057            |     | 0.33                                    | 0.099                                 |
| Insulin-like growth factor-binding protein 7                   | Q16270   | IGFBP7      | 0.19858           | 0.18416           | 0.2418            |     | 0.45                                    | 0.12                                  |
| Isoform 2 of Procollagen-lysine,2-oxoglutarate 5-dioxygenase 2 | O00469-2 | PLOD2       | 0.11478           | 0.20681           | 0.0684            |     | 0.77                                    | 0.12                                  |
| Prolyl endopeptidase FAP                                       | Q12884   | FAP         | 0.048684          | 0.16887           | 0.2649            |     | 0.41                                    | <b>0.043</b>                          |
| Isoform 4 of Caldesmon                                         | Q05682-4 | CALD1       | 0.033457          | -0.05515          | 0.3190            |     | 0.49                                    | <b>0.006</b>                          |
| Periostin                                                      | Q15063   | POSTN       | 0.01555           | 0.33831           | 0.0894            |     | 0.092                                   | <b>0.017</b>                          |
| Isoform 4 of Podoplanin                                        | Q86YL7-4 | PDPN        | 0.012712          | -0.32283          | 0.1487            |     | 0.71                                    | 0.25                                  |
| Lysyl oxidase homolog 2                                        | Q9Y4K0   | LOXL2       | 0.011628          | 0.11567           | 0.6778            |     | 0.21                                    | 0.14                                  |

<sup>1</sup> Normalized spectral abundance factor (NSAF). <sup>2</sup> T/M ratio = TASCs/MASCs ratio. <sup>3</sup> *p* value of log-rank test in TCGA COAD cohort (*n* = 483) dichotomized according to median value. <sup>4</sup> *p* value of log-rank test in TCGA COAD cohort (*n* = 483) dichotomized according to best cut-off.

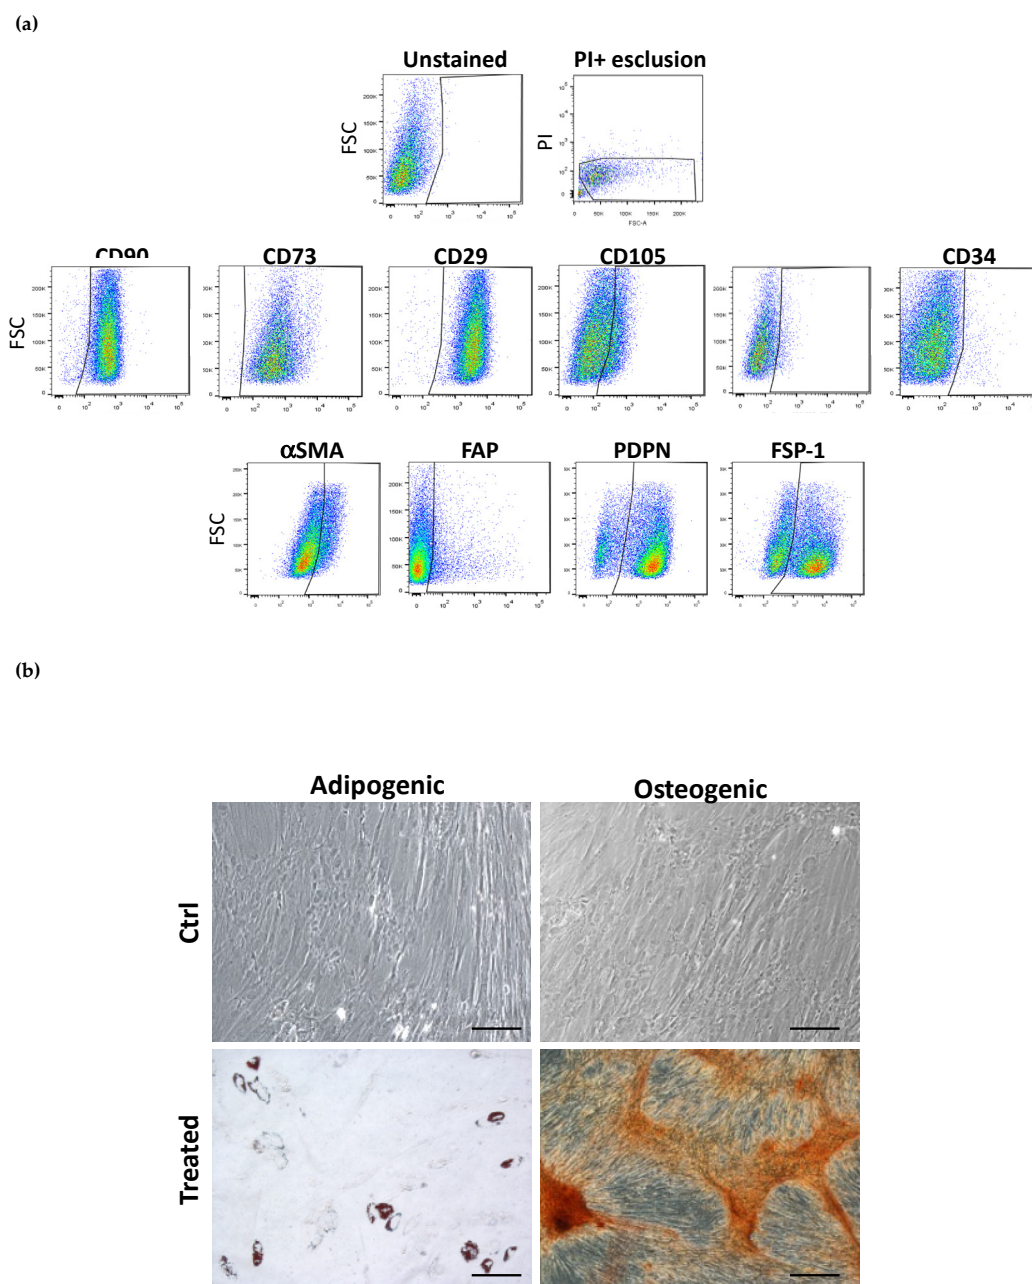

**Figure S1.** Characterization of colon cancer-derived TASCs. (a) Representative phenotypical analysis of TASCs by flow cytometry. Gates are defined according to the corresponding unstained sample. Dead cells are excluded based on PI incorporation. (b) Representative pictures of TASC differentiation into adipogenic and osteogenic lineages, as evaluated by Oil Red O and Alizarin Red staining, respectively. Magnification 20x, scale bar 100µm. Data refer to 1 representative experiment out of 4 independently performed with 4 different TASC samples, with similar results.

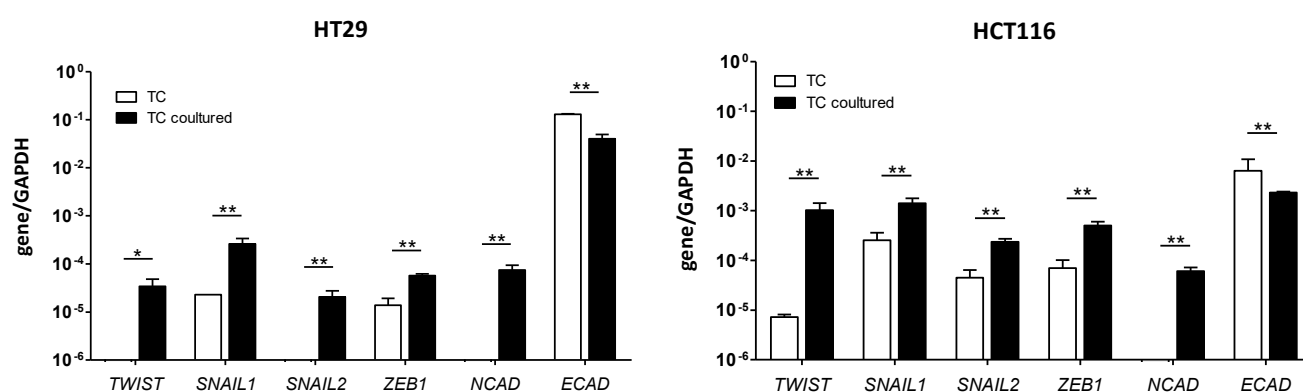

**Figure S2.** TASCs induce upregulation of EMT-related genes in colon cancer cell lines. Quantitative RT-PCR analysis of EMT-related genes in colon cancer cells from the indicated cell lines cultured alone (TC) or cocultured with TASCs (TC cocultured). Mean  $\pm$  SD from triplicates of cultures are shown. \* $p \leq 0.05$ ; \*\* $p \leq 0.01$ .

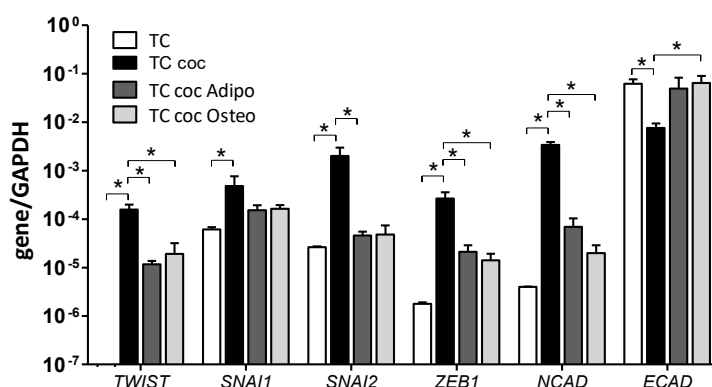

**Figure S3.** TASCs capacity to induce EMT in tumor cells depends on their differentiation state. Quantitative RT-PCR analysis of the expression of EMT-related genes in LS180 cells cultured alone (TC), with TASCs (TC coc), or with TASCs pre-differentiated into adipocytes (TC coc Adipo) or osteocytes (TC coc Osteo). Cumulative data (mean  $\pm$  SD) from four cultures performed with two different TASC samples are shown. Statistical significance of results was evaluated by Mann-Whitney test (\* $p \leq 0.05$  \*\* $p \leq 0.01$ ).

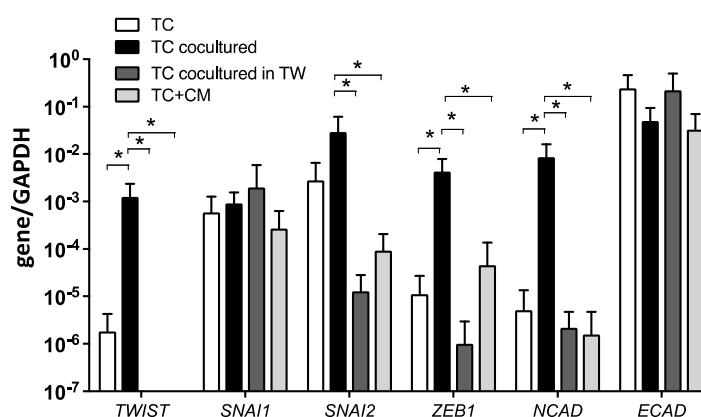

**Figure S4.** Direct cell-to-cell contact between tumor cells and TASCs is required for EMT induction. Quantitative RT-PCR analysis of the expression of EMT-related genes in LS180 cells cultured alone (TC), with TASCs (TC cocultured), with TASCs in transwell plates (TC cocultured in TW), or alone in the presence of TASC-conditioned medium (CM). Data (mean  $\pm$  SD) refer to three independent experiments, performed with TASCs isolated from three different CRC samples. Statistical significance was evaluated by Mann-Whitney test (\* $p < 0.05$ ).

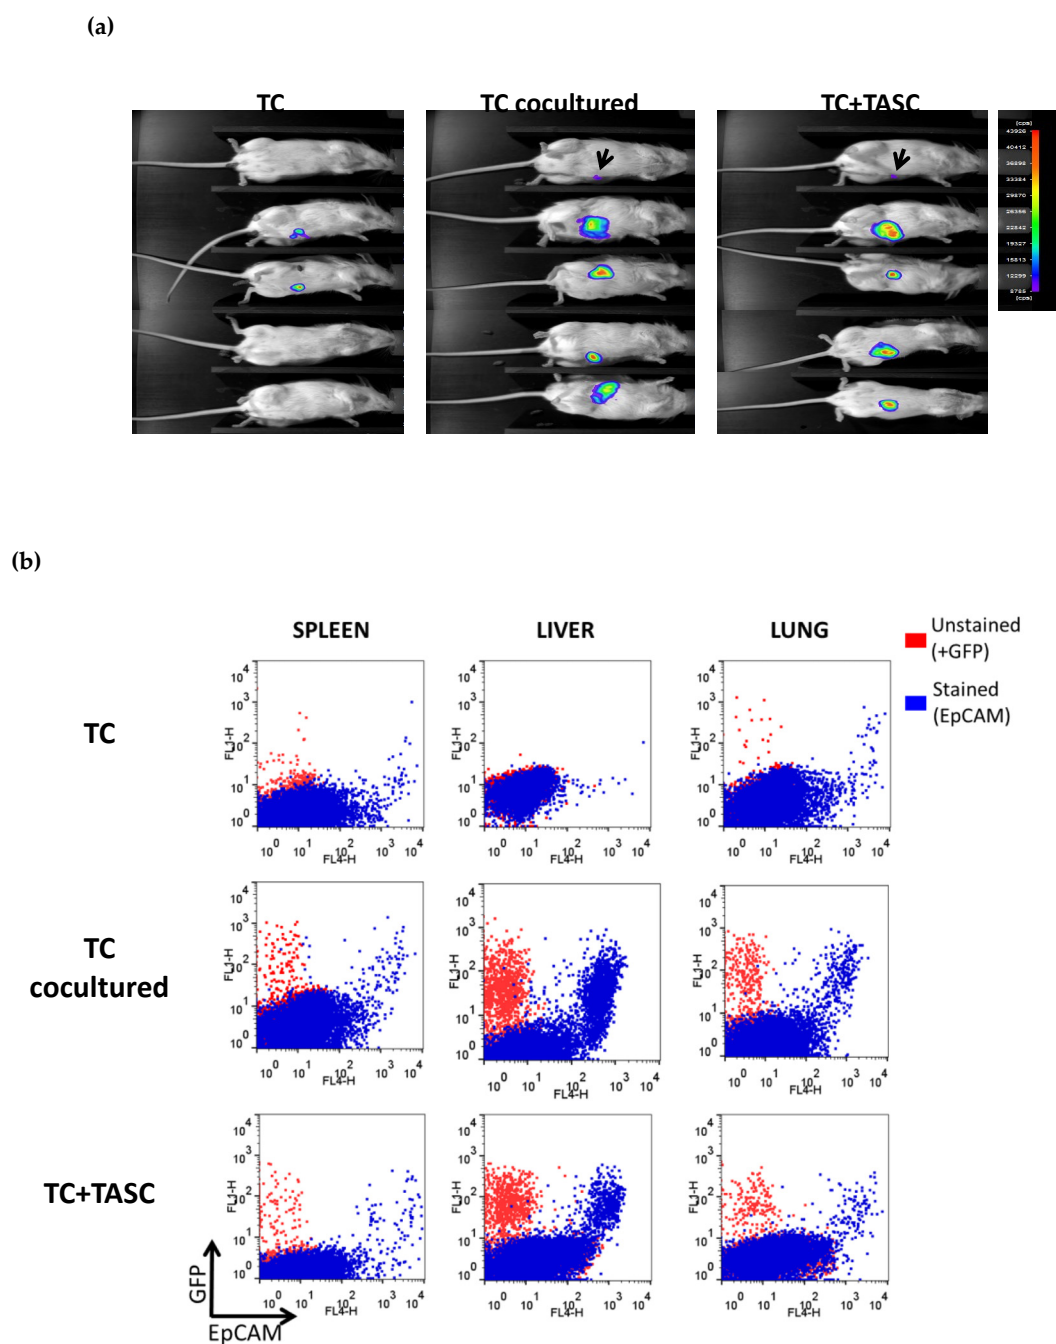

**Figure S5.** Evaluation of tumor growth and metastasis formation upon development of orthotopic tumor xenografts. (a) Representative images of tumor detection by measurement of luciferase activity in NSG mice upon orthotopic i.c. injection of GFP/Luc-LS180 cells alone (TC), cocultured with TASCs and sorted prior to injection (TC cocultured), or cultured alone and admixed with TASCs prior to injection (TC+TASC). Images are displayed as pseudo-color images of peak bioluminescence, with variations in color representing light intensity at a given location. The color bars indicate relative signal intensity. (b) Representative analysis by flow cytometry of cell suspensions from spleens, lungs and livers of tumor bearing mice injected as detailed above. Metastatic tumor cells are detected as GFP+ in unstained samples (red) or as GFP+ EpCAM+ cells upon staining with EpCAM-specific antibodies (blue).
